# Supplementary material
Source: Elsevier journal article supplement (https://www.sciencedirect.com/science/article/pii/S021169952200159X)
Supplement: mmc2 [file S021169952200159X:mmc2.doc]

**TABLAS SUPLEMENTARIAS**

**Tabla S1**

**Criterios EULAR/ACR para la Clasificación del Lupus Eritematoso Sistémico1**

| **Tipo de Criterio** | **Criterio [b]** | **Peso[c]** |
| --- | --- | --- |
| **Criterios clínicos** | **General**   - Fiebre> 38C | 2 |
|  | **Hematológicos**   - Leucopenia <4000 - Trombocitopenia <100000 - Hemólisis autoinmune | 3  4  4 |
|  | **Neuropsiquiátricos**   - Delirio - Psicosis - Convulsión (generalizada o parcial/focal) | 2  3  5 |
|  | **Mucocutáneos**   - Alopecia no cicatrizal - Úlceras orales - Lupus eritematoso cutáneo subagudo o discoide - Lupus cutáneo agudo | 2  2  2  2 |
|  | **Serosa**   - Derrame pleural o pericárdico - Pericarditis aguda | 5  6 |
|  | **Musculoesquelético**  Compromiso conjunto | 6 |
|  | **Renal**   - Proteinuria (> 0.5 g/24 horas) - Biopsia renal de clase II o nefritis lúpica V - Biopsia renal clase III o nefritis lúpica IV | 4  8  10 |
| **Criterios inmunológicos** | **Anticuerpos antifosfolípidos**   - Anticuerpos anticardiolipina o - Anticuerpos anti-glucoproteína I beta-2 o - Anticoagulante lúpico | 2 |
|  | **Proteínas del complemento**   - Bajo C3 o bajo C4 - Bajo C3 y bajo C4 | 3  4 |
|  | **Anticuerpos especí**fi**cos de LES**   - Anticuerpo anti-DNA bicatenario o - Anticuerpo anti-Smith | 6 |

1El criterio de entrada es necesario para clasificar como LES

Criterio de entrada: ANA con un título ≥1: 80 en células HEp-2 o una prueba positiva equivalente (una vez).

Se requiere al menos 1 criterio clínico para clasificar como LES.

Los criterios adicionales aditivos (clínicos o inmunológicos) se cuentan para la puntuación total.

1. Criterios aditivos:

No cuente un criterio si hay una explicación más probable que el LES.

La aparición de un criterio en ≥1 ocasión es suficiente.

No es necesario que los criterios se produzcan simultáneamente.

Dentro de cada dominio sólo el criterio de mayor ponderación se cuenta para la puntuación total si hay más de 1 presente.

1. Se requiere una puntuación total de ≥10 y ≥1 criterio clínico para clasificar como LES.

ACR: American College of Rheumatology; EULAR: European Alliance of Associations for Rheumatology; LES: Lupus Eritematoso Sistémico.

**Tabla S2**

**Sistema de Puntaje Modificado de los Índices de Actividad y Cronicidad para la Nefritis Lúpica de los Institutos Nacionales de Salud (NIH) de los EE. UU.**

| **Índice de actividad** | **Definición1** | **Puntaje2** |
| --- | --- | --- |
| - Hipercelularidad endocapilar | Para cada uno de los hallazgos histopatológicos se puntúa:  1 si se describe como <25%  2 si se describe como 25-50%  3 si se describe como >50% | 0-3 |
| - Neutrófilos/cariorrexis | 0-3 |
| - Necrosis fibrinoide | (0-3) x 2 |
| - Depósitos hialinos3 | 0-3 |
| - Semilunas celulares/fibrocelulares | (0-3) x 2 |
| - Inflamación intersticial4 | 0-3 |
| **Total** | **0-24** |
| **Índice de cronicidad** | **Definición** | **Puntaje** |
| - Glomeruloesclerosis total4 | Para cada uno de los hallazgos histopatológicos se puntúa:  1 si se describe como <25%  2 si se describe como 25-50%  3 si se describe como >50% | 0-3 |
| - Semilunas fibrosas | 0-3 |
| - Atrofia tubular5 | 0-3 |
| - Fibrosis intersticial6 | 0-3 |
| **Total** |  | **0-12** |
| **Otros hallazgos histopatológicos no puntuados** |  |  |
| - Podocitopatía - Glomerulopatía colapsante |  |  |
| - Lesiones vasculares (arterioesclerosis, depósitos de complejos inmunes por causas no inflamatorias, microangiopatía trombótica, vasculitis) | | |

Tomado y adaptado de: *Bajema IM, Wilhelmus S, Alpers CE, Bruijn JA, Colvin RB, Cook HT, et al. Revision of the International Society of Nephrology/Renal Pathology Society classification for lupus nephritis: clarifications of definitions, and modified National Institutes of Health activity and chronicity index. Kidney Int 2018;93:789-96*.

1Indica el porcentaje del glomérulo con presencia del hallazgo histológico específico.

2El puntaje puede ser de 0 a 3 y se debe multiplicar por 2 (mayor ponderación), en las alteraciones histopatológicas especificadas en la tabla.

3Puede ser lesiones tipo asa de alambre y/o trombos hialinos.

4Indica el porcentaje del glomérulo con presencia de leucocitos intersticiales.

5Indica el porcentaje de túbulos corticales con atrofia tubular.

6Indica el porcentaje de corteza con fibrosis intersticial.

**Tabla S3**

**Índice de Actividad del Lupus Eritematoso Sistémico (SLEDAI)**

| **Puntuación** | **SLEDAI** | **Descriptor** | **Definición** |
| --- | --- | --- | --- |
| 8 |  | Convulsiones | De comienzo reciente. Excluir causas infecciosas, metabólicas y fármacos. |
| 8 |  | Psicosis | Habilidad alterada para la función diaria debido a alteración grave en la percepción de la realidad. Incluye alucinaciones, incoherencia,  asociaciones ilógicas, contenido mental escaso, pensamiento ilógico, raro, desorganizado y comportamiento catatónico. Excluir I. renal y fármacos |
| 8 |  | Síndrome Cerebral Orgánico | Función mental alterada con falta de orientación, memoria, u otras  funciones intelectuales, de comienzo rápido y manifestaciones clínicas fluctuantes. Incluye disminución del nivel de conciencia con capacidad reducida para focalizar e inhabilidad para mantener la atención en el medio, más, al menos dos de los siguientes: alteración de la percepción, lenguaje incoherente, insomnio o mareo matutino, o actividad psicomotora aumentada o disminuida. Excluir causas infecciosas, metabólicas y fármacos. |
| 8 |  | Alteraciones  visuales | Retinopatía lúpica. Incluye cuerpos citoides, hemorragias retinianas,  exudados serosos y hemorragias en la coroides, o neuritis óptica.  Excluir HTA, infección o fármacos. |
| 8 |  | Alteración de pares craneales | De reciente comienzo, motor o sensitivo. |
| 8 |  | Cefalea lúpica | Grave, persistente; puede ser migrañosa pero no responde a  analgésicos narcóticos. |
| 8 |  | ACV | De reciente comienzo. Excluir arteriosclerosis. |
| 8 |  | Vasculitis | Ulceración, gangrena, nódulos dolorosos sensibles, infartos  periungueales, hemorragias en astilla o biopsia o angiografía que  confirme la vasculitis. |
| 4 |  | Miositis | Debilidad proximal/dolor asociado a elevación de las CPK/aldolasa o EMG sugestivo o miositis comprobada por biopsia. |
| 4 |  | Artritis | Más de dos articulaciones dolorosas y con signos inflamatorios |
| 4 |  | Cilindros urinarios | Cilindros hemáticos o granulosos. |
| 4 |  | Hematuria | >5 hematíes/c. Excluir litiasis, infección u otras causas. |
| 4 |  | Proteinuria | > 5 g/24 horas de reciente comienzo o aumento de la proteinuria ya  conocida en más de 0.5 g/24 horas. |
| 4 |  | Piuria | > 5 leucocitos/c. Excluir infección |
| 2 |  | Exantema nuevo | Comienzo reciente o recurrente. Exantema inflamatorio |
| 2 |  | Alopecia | De comienzo reciente o recurrente. Pérdida difusa o en placas. |
| 2 |  | Ulceras orales | De comienzo reciente o recurrente. Ulceras bucales o nasales. |
| 2 |  | Pleuritis | Dolor pleurítico con roce o derrame, o engrosamiento pleural. |
| 2 |  | Pericarditis | Dolor pericárdico con al menos uno de los siguientes: roce, derrame,  cambios electrocardiográficos o confirmación ecocardiográfica |
| 2 |  | Complemento | Descenso de CH50, C3, C4 por debajo del límite inferior del laboratorio. |
| 2 |  | Anti-DNA | > 25%. Técnica de Farr o por encima del valor habitual del laboratorio. |
| 1 |  | Fiebre | Fiebre > 38ºC. Excluir infección. |
| 1 |  | Plaquetas | Trombopenia < 100.000 plaquetas/mm3. |
| 1 |  | Leucopenia | < 3000 células/mm3. Excluir fármacos. |
| **Puntuación total** |  | Nota: puntúa en la escala SLEDAI si el descriptor está presente en el día de la  visita o 10 días antes. | |

Tomado de: *Bombardier Gladman DD, Urowitz MB, Caron D, Chang CH. Derivation of the A disease activity index for lupus patients. The Committe on prognosis studies. Arthritis Rheum. 1992;35:630-40*.

ACV: Accidente cerebro-vascular; CPK: Creatinfosfoquinasa; EMG: Electromiografía; HTA: Hipertensión arterial.

**Tabla S4**

**Manifestaciones clínicas y analíticas habituales según la Clase Histológica**

| **Clase histológica ISN/RPS** | **Manifestación clínica y/o alteración analítica** |
| --- | --- |
| - Clase I | Función renal normal, proteinuria no nefrótica, microhematuria1 |
| - Clase II | Función renal normal, proteinuria no nefrótica, microhematuria1 |
| - Clase III | Proteinuria mayor que en las Clases I y II, aunque generalmente sin síndrome nefrótico. Alteraciones del sedimento urinario (microhematuria, cilindros hemáticos). Disminución de filtrado glomerular e hipertensión ocasionalmente |
| - Clase IV | Proteinuria, hematuria y alteraciones del sedimento en prácticamente todos los casos. Síndrome nefrótico completo en una elevada proporción de casos y hematuria macroscópica no infrecuente. Deterioro de función renal de gravedad variable en una proporción significativa de casos. Hipertensión arterial, sobre todo en casos con insuficiencia renal |
| - Clase V | Síndrome nefrótico completo en la mayoría de los casos, en el resto proteinuria no nefrótica. Función renal y presión arterial normales salvo en fases avanzadas de la enfermedad. Alteraciones del sedimento menos evidentes que en las clases III y IV |

1En pacientes con clases histológicas I o II y síndrome nefrótico completo, debe pensarse en una podocitopatía lúpica (fusión difusa de procesos podocitarios evidenciados en la microscopía electrónica).

ISN/RPS: International Society of Nephrology/Renal Pathology Society.

**Tabla S5**

**Efectos Adversos de los Antipalúdicos**

| **Alteraciones de órganos o sistemas** | **Acciones que tomar para su prevención o mejoría** |
| --- | --- |
| **Maculopatía**  **Factores de riesgo**   - Dosis diaria > 400 mg o > 5 mg/kg/día - Dosis acumulada > 1000 g - Duración del tratamiento > 5 años - Maculopatía subyacente - Edad >60 años - Enfermedad renal o hepática   **Riesgo de toxicidad por antipalúdicos**   - A los 5 años < 1% - A los 10 años < 2% - A los 20 años 20% | Es irreversible  Discontinuar el fármaco  Requiere revisión oftalmológica:   - Al inicio - A los 5 a y después anual en pacientes sin factores de riesgo - Anual en paciente con algún factor de riesgo |
| **Cardíaca**   - Insuficiencia cardiaca congestiva - Alteraciones de la conducción - Hipertrofia ventricular izquierda - Depresión de la función sistólica | Requieren retirada inmediata del tratamiento |
| **Neuromuscular**   - Miopatía - Neuropatía periférica | Requieren retirada inmediata del tratamiento |
| **Gastrointestinal**   - Intolerancia gástrica | Mejora al reducir la dosis |
| **Cutánea**   - Prurito | Mejora al reducir la dosis |

**Tabla S6**

**Efectos Adversos asociados al tratamiento con Ciclofosfamida**

| **Efecto adverso según órgano o sistema** | **Observaciones, medidas preventivas** |
| --- | --- |
| - Toxicidad hematológica: anemia, leucopenia, trombopenia | Usualmente benigna. Nadir: a los 7-10 días (linfocitos) y a los 10-14 días (granulocitos). Se previene con dosis más bajas y tratamientos más cortos.  Usar GCSF para leucopenia grave (riesgo potencial de brote). |
| - Toxicidad gastrointestinal: anorexia, náuseas, dismotilidad, diarreas, hepatotoxicidad (ocasional) | Más riesgo con dosis IV altas.  Reducir dosis, espaciar ciclos, hidratación, uso de antieméticos (ondansetrón). |
| - Toxicidad pulmonar: neumonitis intersticial aguda y a largo plazo acompañada de fibrosis | Sospecha clínica si se aprecian opacidades bilaterales en radiografía de tórax o en TAC (vidrio esmerilado en campos superiores).  Usar dosis bajas y tratamientos cortos. Corticoides para casos agudos. |
| - Toxicidad cardíaca: miocarditis hemorrágica, hemopericardio, insuficiencia cardíaca | Utilizar dosis más bajas y tratamientos cortos. Dar tratamiento de soporte.  Si hay mejoría, no suele dejar secuela en el ECG o en el ecocardiograma. |
| - Toxicidad vesical: cistitis hemorrágica, dolor vesical, carcinoma de células transicionales, fibrosis de vejiga | Factores de riesgo: dosis acumulada > 30g, CYC oral, obstrucción urinaria, falta de hidratación, disminución de diuresis a las 24h post-CYC.  Prevención: MESNA, hidratación con SS, irrigación vesical, evaluación urológica. |
| - Toxicidad gonadal: falla ovárica (infertilidad), disminuye estradiol sérico, progesterona e induce azoospermia | Bajo riesgo si se usa CYC IV por ≤ 6 meses.  Riesgo de falla ovárica aumenta con la edad y según dosis de CYC (40-50 años con 5 g, 30-40 años con 9 g, 20-30 años con 20 g). Minimizar dosis y duración.  Preservación de ovocitos, análogos de GNRH y banco de esperma. |
| - Teratogenicidad: ausencia de pulgares y/o dedos de los pies, anomalías palatinas, arteria coronaria única. | Muy teratogénica. Cruza la placenta y se excreta en la leche materna.  Mayor toxicidad durante la primera mitad del embarazo.  Usar técnicas anticonceptivas efectivas. |
| - Disturbios hidroelectrolíticos: Hiponatremia asociada a SIADH. | Mayor riesgo con dosis > 20 mg/kg IV, uso de AINEs y/o ↓previa de eGFR.  Muy raro con dosis ≤ 15 mg/kg IV  Usar dosis bajas de CYC IV, disminuir ingesta de agua a 1 litro, soporte. |
| - Infecciones: bacterianas, víricas (H. Zoster), micóticas (neumonía por P. jirovecci). | Mayor riesgo si uso concomitante de corticoides y/o hipogammaglobulinemia.  Profilaxis contra P. jirovecci: TMP-SMX 3 días/semana.  Alternativas: dapsona (100 mg/día) o atavacuona (1500 mg/día).  Uso GCSF para leucopenia grave (riesgo potencial de brote). |
| - Neoplasias: de piel, atipia cervical, hematológicas (LMA, SMD). | Más riesgo si dosis acumulada > 30g. Puede ocurrir años después de su retiro.  No evidencia en pacientes con NL que recibieron CYC IV.  Usar CYC IV con duraciones cortas del tratamiento (dosis acumuladas < 10 g). |

AINEs: antiinflamatorios no esteroideos; CYC: ciclofosfamida; ECG: electrocardiograma; GCSF: factor estimulante de colonias de granulocitos; IV: vía intravenosa; LMA: leucemia mieloide aguda; MESNA: 2-sulfaniletansulfonato de sodio; NL: nefritis lúpica; SIADH: síndrome de secreción inapropiada de hormona antidiurética; SMD: síndrome mielodisplásico; SS: suero salino; TAC: tomografía axial computarizada; TMP-SMX: trimetoprima-sulfametoxazol.

**Tabla S7**

**Mecanismo de acción, propiedades farmacológicas y efectos biológicos de los Inhibidores de Calcineurina**

| **Características**  **del fármaco** | **Fármaco anticalcineurínico** | | |
| --- | --- | --- | --- |
| **Ciclosporina A (CsA)** | **Tacrolimus (FK-506)** | **Voclosporina (VCS)** |
| **Fórmula química** | C62H111N11O12 | C44H69NO12 | C63H111N11O12 |
| **Mecanismo**  **de acción** | - Unión a ciclofilina - Inhibición de calcineurina - Inactivación del NF-AT | - Unión a FKBP-12 - Inhibición de calcineurina - Inactivación del NF-AT | - Unión a ciclofilina - Inhibición de calcineurina - Inactivación del NF-AT |
| **Propiedades farmacológicas** | - Absorción oral lenta e incompleta (20-50%) - T1/2 variable (aproximada 18h) - Metabolismo CYP450 3A4 hepático - Excreción biliar predominante - Interacción con varios fármacos - Monitorización y ajuste de dosis - Niveles séricos: 60-100 ng/mL | - Absorción oral variable e incompleta - T1/2 11.3h (sanos 3.5-43h, trasplantados 9-15h) - Metabolismo: CYP450 3A4 hepático - Excreción fecal predominante - Interacción con varios fármacos - Monitorización y ajuste de dosis - Niveles séricos: 4-7 ng/mL - Potencia 10-100 veces > CsA | - T1/2 aproximada 30 h - Metabolismo CYP450 3A4 hepático - Excreción fecal predominante - Interacción desconocida con diversos fármacos - No monitorización ni ajuste de dosis - No requiere niveles séricos específicos - Potencia 8 veces > CsA |
| **Efectos biológicos** | Son comunes para los tres fármacos:   - *Efecto inmunosupresor:* - Disminución de producción de citocinas proinflamatorias (IL-2, IL-3, IL-6, IFNγ) - Inhibición de mitosis y proliferación de linfocitos T - *Efecto no inmunosupresor:* - Preservación de la sinaptopodina podocitaria y del citoesqueleto de actina - Efecto vasoconstrictor sobre la arteriola aferente renal - Efecto antiproteinúrico | | |

CsA: ciclosporina A; CYP5450: sistema del citocromo P450; FKBP: proteína de unión a FK; NF-AT: factor nuclear activador de linfocitos T; T½: tiempo de vida media o de semivida; VCS: voclosporina.

**Tabla S8**

**Fármacos y dianas terapéuticas en ensayos clínicos activos en Nefritis Lúpica**

| **Fármaco** | **Diana terapéutica** | **Nombre del estudio** | **Fase** | **Estado** | **Referencia** |
| --- | --- | --- | --- | --- | --- |
| Secukinumab | IL-17A | SELUNE | 3 | En curso | NCT04181762 |
| Guselkumab | IL-23 | ORCHID-LN | 2 | En curso | NCT04376827 |
| Iscalimab | CD40 | - | 2 | En curso | NCT03610516 |
| BI 655064 | CD40 | - | 2 | En curso | NCT03385564 |
|  |  | - | 2 | En curso | NCT02770170 |
| Daratumumab | CD38 | - | - | Completado | NCT04868838 |
| Ravulizumab | C5 | - | 2 | En curso | NCT04564339 |
| Narsoplimab | MASP-2 | - | 2 | En curso | NCT02682407 |
| APL-2 | C5 | - | 2 | En curso | NCT03453619 |
| ALXN | Factor D | - | 2 | En curso | NCT05097989 |

**Tabla S9**

**Fármacos permitidos y prohibidos durante el Embarazo en la paciente con Nefritis Lúpica**

| **Fármaco** | **Uso aceptado durante el embarazo** | **Efectos secundarios** |
| --- | --- | --- |
| Azatioprina | Sí | Toxicidad hematológica |
| Inhibidores de la calcineurina | Sí | Hipertensión, diabetes gestacional |
| Hidroxicloroquina | Sí | Su retirada puede ocasionar recaída |
| Corticoides | Sí | Diabetes gestacional, rotura prematura de membranas |
| Ciclofosfamida | No | Teratogenicidad, mielosupresión |
| Leflunomida | No | Teratogenicidad |
| Metotrexato | No | Teratogenicidad |
| MMF/MPA | No | Teratogenicidad |
| Rituximab | No | Depleción de células B en el neonato |

MMF/MPA: Mofetil micofenolato o derivados del ácido micofenólico.

**Tabla S10**

**Indicaciones de Biopsia Renal en el Paciente Pediátrico**

| **Indicaciones específicas** |
| --- |
| - Alteración del sedimento urinario (microhematuria, cilindros hemáticos) |
| - Hematuria macroscópica |
| - Insuficiencia renal de causa no explicada por otros factores |
| - Proteinuria > 0.5 g/24 horas o uPCR > 0.5 g/g (si es aislada, se descartar previamente una proteinuria ortostática) |

uPCR: cociente proteína/creatinina en orina (del inglés: urinary protein-creatinine ratio).

**Tabla S11**

**Estratificación de Riesgo de PTT en pacientes con MAT: Plasmic Score1**

| **Parámetro por medir** | **Puntuación** |
| --- | --- |
| - Plaquetas < 30 x 109/L (o < 30000/mm3) | No = 0, Sí = +1 |
| - Datos de hemólisis2 | No = 0, Sí = +1 |
| - Cáncer activo (tratado por cáncer en el año previo) | No = +1, Sí = 0 |
| - Historia de trasplante de médula ósea (stem-cell) o de órgano sólido | No = +1, Sí = 0 |
| - VCM < 90 fl | No = 0, Sí = +1 |
| - INR < 1.5 | No = 0, Sí = +1 |
| - Creatinina sérica < 2 mg/dL | No = 0, Sí = +1 |

1Tomado de: <https://www.mdcalc.com/calc/10200/plasmic-score-ttp> y de https://harvardtma.partners.org/PLASMIC/

**2**Recuento de reticulocitos > 2.5%, haptoglobina indetectable o bilirrubina indirecta > 2 mg/dL.

MAT: Microangiopatía trombótica; PTT: Púrpura trombótica trombocitopénica; VCM: Volumen corpuscular medio.

**Tabla S12**

**Factores de Riesgo para el desarrollo de Infecciones en pacientes con LES y NL**

| **Factor o Condición de Riesgo** |
| --- |
| - Enfermedad activa (especialmente nefritis) |
| - Brote o recaída lúpica |
| - Dosis de prednisona > 7.5-10 mg/día |
| - Uso de glucocorticoide IV y/o ciclofosfamida IV a dosis altas |
| - Leucopenia (linfopenia y neutropenia) |
| - Aumento en los niveles de anti-dsDNA |
| - Presencia de anticuerpos antifosfolípidos |
| - Defectos inmunitarios específicos en el paciente con LES: - Alteraciones en la inmunidad celular y el sistema fagocítico: - Disminución en la fagocitosis por los monocitos-macrófagos - Defectos en subtipos de células T (CD4+) y de las “natural killers” - Disminución en la producción de IL-2 e IFN-γ - Alteraciones en la inmunidad humoral: - Hipogammaglobulinemia - Deficiencias en subclases de IgG y de IgA - Alteraciones del receptor gamma cristalizable (FcγR) por autoanticuerpos - Defectos en el sistema retículo-endotelial (asplenia funcional) - Disfunción del sistema del complemento - Disminución de C1q, C1r/C1s y otros componentes del complemento (C3, C5-9) - Deficiencias en la vía de la manosa-lectina. - Disfunción en la opsonización (anticuerpos anti-C1q) - Alteración del Fc-γRIIa |
| - Hipoalbuminemia y estado nutricional |
| - Comorbilidades (Diabetes mellitus, EPOC, hepatopatía, enfermedad renal crónica) |

Tabla modificada y adaptada de: *Parikh UN, Sands MF, Schwartz SA: Infection in patients with autoimmune diseases. In Segal BH, editor: Management of Infections in the Immunocompromised Host. Springer 2018, pp 283-95*.

EPOC: Enfermedad pulmonar obstructiva crónica; IV: Vía intravenosa; LES: Lupus eritematoso sistémico.

**Tabla S13**

**Pautas de Tratamiento Profiláctico para diversas Infecciones de riesgo en pacientes con LES y/o NL bajo tratamiento inmunosupresor**

| **Infección** | **Agente etiológico** | **Pauta recomendada** | **Observaciones** |
| --- | --- | --- | --- |
| **Viral** |  |  |  |
| Hepatitis B | *Virus de la Hepatitis B* | Entecavir o tenofovir durante el tiempo que dure la terapia inmunosupresora y luego 6-12 meses luego del tratamiento inmunosupresor. | Obligatorio en pacientes con HBsAg+ o con HBsAg- pero que recibirán terapia anti-células B (rituximab, obinutuzumab, belimumab). |
| Hepatitis C | *Virus de la Hepatitis C* | No se especifica el tratamiento profiláctico  Si se decide tratamiento, la duración es de 12 semanas.  Para ERC estadios G1, G2 y G3: igual a la población general.  Para ERC estadios G4 y G5: según genotipo  Genotipos 1a, 1b y 4: dosis fijas diarias de elbasvir 50 mg y grazoprevir 100 mg.  Genotipos 1 al 6: combinación diaria de glecaprevir (300 mg) y pibrentasvir (120 mg). | En caso de iniciar tratamiento, depende del genotipo y la eGFR (más seguridad si eGFR > 30 mL/min/1.73m2). |
| **Bacteriana** |  |  |  |
| Tuberculosis latente | *M. tuberculosis* | Isoniazida durante 9 meses (5 mg/kg/día, máximo 300 mg/día en adultos).  Rifampicina por 4 meses (10 mg/kg/día, máximo 600 mg/día).  Isoniazida + Rifampicina durante 3 meses. | Dar tratamiento profiláctico sólo si se ha descartado una infección activa.  Isoniazida más hepatotóxica.  Rifampicina mejor tolerada. |
| **Fúngica** |  |  |  |
| Pneumonia | *Pneumocystis jirovecci* | TMP-SMX 160/800 mg 3 días por semana en días alternos durante el tiempo de tratamiento con GC a dosis altas o con ciclofosfamida.  En caso de alergia al sulfametoxazol, dar dapsona 100 mg/día. | Disminuir dosis al 50% si Aclaramiento de creatinina < 30mL/min. |
| Candidiasis | *Candida*. | No hay regímenes específicos recomendados para tratamiento profiláctico. | No hay estudios específicos en LES y/o NL. |
| **Parasitaria** |  |  |  |
| Estrongiloidiasis | *S. stercolaris* | Ivermectina 200 mcg/kg por dos días consecutivos o separados una semana.  Albendazol 400 mg oral 2 veces/día durante 3-7 días (menos eficaz). | Es clave la historia epidemiológica.  Las pruebas serológicas pueden ser negativas en inmunosuprimidos. |
| Otras parasitosis | *E. histolytica*  *T. cruzi,*  *Leishmania* | Tratar como para la población general, pero tomando en cuenta el grado de inmunosupresión y el tratamiento de base en curso. | No hay recomendaciones específicas para pacientes con LES y/o NL. |

Todo tratamiento preventivo/profiláctico se recomienda antes de iniciar la terapia inmunosupresora.

ERC: Enfermedad renal crónica; eGFR: Tasa de filtración glomerular estimada; LES: Lupus eritematoso sistémico; NL: nefritis lúpica; TMP/SMX: Trimetoprima/sulfametoxazol.

**Tabla S14**

**Evaluación del Historial de Vacunaciones y de posibles vacunas a aplicarse antes del tratamiento inmunosupresor y de viajes a zonas endémicas**

| **Historial de vacunaciones previo al**  **tratamiento inmunosupresor** | **Posibles vacunaciones antes de los viajes**  **a zonas endémicas o de riesgo** |
| --- | --- |
| - *Haemophilus influenzae* | - *Toxoide tetánico* |
| - *Hepatitis A y Hepatitis B* | - *Virus de la Influenza* |
| - *Neisseria meningitidis* | - *Hepatitis A y B* |
| - *Papiloma virus humano* |  |
| - *Rubeola/Sarampión/Paperas* |  |
| - *Streptococcus pneumoniae* |  |
| - *Toxoide tetánico* |  |
| - *Virus de la Influenza* |  |

**Tabla S15**

**Eficacia y Seguridad de las vacunas en pacientes con LES**

| **Vacuna** | **Tipo** | **Eficacia** | **Riesgo1** | **Recomendada** | **Comentarios** |
| --- | --- | --- | --- | --- | --- |
| **Infecciones bacterianas** | |  |  |  |  |
| - *S. pneumoniae* | PPSV23 (polisacárido)  PVC13 (conjugada) | Alta | Bajo | Sí | Pocos estudios en pacientes con LES/NL.  La eficacia puede bajar con rituximab y MTX. |
| - *H. influenzae tipo B* | Conjugada | Alta (88%) | Bajo | Sí | La eficacia puede disminuir en el LES activo. |
| - *N. meningitidis* | Polisacárido  Conjugado | Alta | NE | Sí para LES con asplenia o viajes a zonas endémicas | No estudiada en LES o en NL. |
| - *M. tuberculosis (BCG)* | Virus vivo atenuado | NE | NE | No | Reporte de fenómenos autoinmunitarios.  Efectividad no clara en población adulta sana. |
| - *Tos ferina* | Conjugada (inactiva y acelular) | NE | NE | No claro | No estudios en LES/NL.  Puede requerir dosis de refuerzo  Tendencia a administrarla a adultos mayores. |
| - *Difteria* | Toxoide | Alta | Baja | Sí | Pocos estudios en LES/NL. |
| - *Cólera* | Bacterias inactivadas | NE | NE | No | No estudiada en LES/NL.  Efecto poco duradero. |
| - *Salmonella typhi* | Vivas atenuadas (oral)  Polisacáridos | NE  NE | NE  NE | No  No | Contraindicada si se toman inmunosupresores  Posiblemente menos efectiva |
| **Infecciones víricas** | |  |  |  |  |
| - *Gripe (Influenza)* | Virus inactivado  (trivalente y monovalente) | Alta | Baja | Sí | Puede disminuir la inmunogenicidad en caso de tratamiento con rituximab. |
| - *SARS-CoV-2* | ARN mensajero  Vectores | Alta | Baja | Sí | Idealmente administrarla antes del tratamiento inmunosupresor. |
| - *Herpes Zoster* | Recombinante  Virus vivos atenuados | Alta  Alta | Baja  NE | Sí  No | La de virus vivo debe evitarse en LES, excepto con alto riesgo de contagio y con IS leve. |
| - *Papilomavirus humano* | Recombinante | Alta  (80-90%) | Baja-Medio  (hasta 30%) | Sí | Estudiado en mujeres, no claro en hombres |
| - *Toxoide tetánico* | Toxoide | Alta  (90%) | Baja | Si | No terapia anti-células B en las 24 semanas previas. Dar Ig antitetánica si hay riesgo verdadero (heridas graves y/o contaminadas). |
| - *Hepatitis A y B* | Recombinante | Alta | Baja  (ocasional) | Si en situaciones específicas | Se recomienda en caso de viaje a zona endémica o contacto de alto riesgo.  Valorar dosis de refuerzo.  Los inmunosupresores pueden reactivar VHB. |
| - *MMR* | Virus vivo atenuado | NE | NE | No/Sí | En general deben evitarse. Considerar su uso si la IS es leve y es dosis de refuerzo (“booster”). |
| - *Polio* | Virus vivo atenuado  Virus inactivado | Alta | Baja (5%) | Sí para la inactivada | La de virus vivo está contraindicada.  Pocos estudios en LES y ninguno en NL. |
| - *Rabia* | Virus inactivados | NE | NE | Sí | No estudios en LES ni en NL. |
| - *Fiebre amarilla* | Virus vivos atenuados | NE | NE | No | Está contraindicada. |
| - *Encefalitis japonesa* | Virus inactivados | NE | NE | Sólo en viajes | No estudios en LES ni en NL. |

1Riesgo de brote.

IS: inmunosupresión; LES: Lupus eritematoso sistémico; MMR: vacuna contra el sarampión, paperas y rubeola, NE: no estudiado específicamente en los pacientes con LES y/o NL; NL: Nefritis lúpica.

**Tabla S16**

**Vacunación contra SARS-CoV-2: modificaciones en la terapia inmunosupresora e indicaciones según la condición del paciente**

| **Medicación inmunosupresora** | **Modificación sugerida** | **Grado de Consenso** |
| --- | --- | --- |
| Hidroxicloroquina,  IgG humana IV, glucocorticoides (prednisona <20 mg/día) | No realizar modificaciones | Fuerte |
| Leflunomida, azatioprina,  Ciclofosfamida oral,  Belimumab, glucocorticoides  (prednisona ≥ 20 mg/día) | No realizar modificaciones | Moderada |
| Micofenolato | Si la enfermedad está en remisión, suspender micofenolato durante 1 semana después de cada dosis de vacuna | Moderada |
| Metotrexato | Suspender el uso de metotrexato 2 semanas después de la vacuna COVID-19 de dosis única para aquellos con la enfermedad bien controlada | Moderada |
| Ciclofosfamida intravenosa | Cuando sea posible, programar la administración de ciclofosfamida ~ 1 semana después de cada dosis de vacuna. | Moderada |
| Rituximab | Si el riesgo de contagio es bajo o se puede disminuir con medidas preventivas (autoaislamiento, uso de mascarillas, etc.), programar la vacunación de modo que se inicie ~ 4 semanas antes del próximo ciclo programado de rituximab. Después de la vacunación, posponga el rituximab entre 2 a 4 semanas después de la dosis final de la vacuna si la actividad de la enfermedad lo permite. | Moderada |
| **Condición médica** | **Recomendación** | **Grado de Consenso** |
| Potencialmente mortal (v.g. en la UCI por cualquier razón) | Posponer la vacunación hasta que la enfermedad esté mejor controlada | Moderado |
| Enfermedad activa, pero sin peligro mortal | Debe recibir la vacuna COVID-19 | Fuerte |
| Enfermedad estable o con baja actividad | Deben recibir la vacuna COVID-19 | Fuerte |
| Enfermedad autoinmune sin recibir aún tratamiento inmunomodulador | Deben recibir la primera dosis de la vacuna COVID-19 antes de iniciar la terapia inmunomoduladora cuando sea posible | Moderada |

IgG: Inmunoglobulina G humana; IV: Vía intravenosa; UCI: Unidad de cuidados intensivos.
